# Supplementary material for: Prediction of persistent acute kidney injury in postoperative intensive care unit patients using integrated machine learning: a retrospective cohort study
Source: PubMed Central journal article supplement (PMC9556643; doi:10.1038/s41598-022-21428-5), 2022-10-12
Supplement: 41598_2022_21428_MOESM1_ESM.pdf [file 41598_2022_21428_MOESM1_ESM.pdf]

**Supplementary Information**

**Prediction of persistent acute kidney injury in postoperative  
intensive care unit patients using integrated machine  
learning: A retrospective cohort study**

**Xuandong Jiang<sup>\*1</sup>, Yongxia Hu<sup>1</sup>, Shan Guo<sup>1</sup>, Chaojian Du<sup>1</sup>, Xuping Cheng<sup>1</sup>**

<sup>1</sup>Intensive Care Unit, Affiliated Dongyang Hospital of Wenzhou Medical University, Dongyang, Zhejiang, P.R. China

**Corresponding author:** Xuandong Jiang, MD, Intensive Care Unit, Affiliated Dongyang Hospital of Wenzhou Medical University, Dongyang, Zhejiang, P.R. China, No. 60 Wuning West Road, Jinhua, China.

Email: lxqjiang@hotmail.com.

Table S1 Baseline characteristics and clinical outcomes between persistent AKI and transient AKI groups in the MIMIC III cohort

| Variables                                          | Transient AKI (n = 1741) | Persistent AKI (n = 1429) | P-value |
|----------------------------------------------------|--------------------------|---------------------------|---------|
| Age (years), mean (SD)                             | 1022 (58.7)              | 860 (60.2)                | 0.419   |
| Male, n (%)                                        | 61.7 ± 18.5              | 66.9 ± 15.4               | < 0.001 |
| SOFA (score), mean (SD)                            | 4.4 ± 2.6                | 6 ± 3.1                   | 0.32    |
| Height (cm), mean (SD)                             | 169.6 ± 10.6             | 169.3 ± 11.3              | 0.32    |
| Weight (kg), mean (SD)                             | 79.7 ± 18.6              | 84.8 ± 23.8               | < 0.001 |
| AKI stage, n (%)                                   |                          |                           | < 0.001 |
| 1                                                  | 868 (49.9)               | 368 (25.8)                |         |
| 2                                                  | 779 (44.7)               | 753 (52.7)                |         |
| 3                                                  | 94 (5.4)                 | 308 (21.6)                |         |
| admission_type, n (%)                              |                          |                           | < 0.001 |
| ELECTIVE                                           | 375 (21.5)               | 393 (27.5)                |         |
| EMERGENCY                                          | 1339 (76.9)              | 1004 (70.3)               |         |
| URGENT                                             | 27 (1.6)                 | 32 (2.2)                  |         |
| Comorbidities, n (%)                               |                          |                           |         |
| Coronary                                           | 531 (30.5)               | 576 (40.3)                | < 0.001 |
| Hypertension                                       | 868 (49.9)               | 721 (50.5)                | 0.764   |
| Diabetes                                           | 353 (20.3)               | 413 (28.9)                | < 0.001 |
| Biochemical indexes on ICU admission               |                          |                           |         |
| White blood cell (× 10 <sup>9</sup> /L), mean (SD) | 13 ± 6.1                 | 12.8 ± 6.2                | 0.573   |
| Urea (mmol/L), mean (SD)                           | 15 (12, 19)              | 18 (13, 23)               | < 0.001 |
| pH, mean (SD)                                      | 7.4 ± 0.1                | 7.4 ± 0.1                 | 0.006   |
| Lactate (mmol/L), median (IQR)                     | 2 (1.3, 3.1)             | 2.2 (1.5, 3.4)            | < 0.001 |
| Bicarbonate (mmol/L), mean (SD)                    | 22.9 ± 3.6               | 22.8 ± 3.8                | 0.31    |
| Vital signs on first day ICU admission             |                          |                           |         |
| Minimum glucose (mmol/l), mean (SD)                | 101.9 ± 28.7             | 95.9 ± 29.9               | < 0.001 |
| Maximum glucose (mmol/l), median (IQR)             | 173 (147, 205)           | 183 (157, 218)            | < 0.001 |
| Mean glucose (mmol/l), median (IQR)                | 131.83 (119, 151.75)     | 131.83 (119.81, 152.89)   | 0.473   |
| Minimum heart rate (bpm), mean (SD)                | 72.7 ± 14.5              | 71.5 ± 14.2               | 0.016   |
| Maximum heart rate (bpm), mean (SD)                | 107.2 ± 20.3             | 106.6 ± 20.5              | 0.426   |
| Mean heart rate (bpm), mean (SD)                   | 88.3 ± 14.9              | 87.5 ± 14.6               | 0.121   |
| Minimum temperature (°C),                          | 36 ± 0.9                 | 35.8 ± 1                  | < 0.001 |

|                                |                   |                     |         |
|--------------------------------|-------------------|---------------------|---------|
| mean (SD)                      |                   |                     |         |
| Maximum temperature (°C),      | 37.8 ± 0.8        | 37.7 ± 0.8          | < 0.001 |
| mean (SD)                      |                   |                     |         |
| Mean temperature (°C), mean    | 37 ± 0.6          | 36.9 ± 0.7          | < 0.001 |
| (SD)                           |                   |                     |         |
| Outcome                        |                   |                     |         |
| ICU length of stay (days),     | 4.19 (2.95, 7.89) | 4.95 (2.98, 10.44)  | 0.002   |
| median (IQR)                   |                   |                     |         |
| Hosp. LOS (days) ,median (IQR) | 10.58 (7.12, 17)  | 11.96 (7.21, 19.67) | < 0.001 |
| Hospital mortality, n (%)      | 130 (7.5)         | 218 (15.3)          | < 0.001 |

AKI, acute kidney injury; MIMIC, Medical Information Mart for Intensive Care; SOFA, Sepsis-related Organ Failure Assessment; ICU, intensive care unit; Hosp. LOS, length of hospital stay.

Table S2. Comparison of the additional evaluation metrics of four machine learning models in internal and external validation

| Models for Predicting Persistent AKI in Internal Validation |      |      |         |          |
|-------------------------------------------------------------|------|------|---------|----------|
|                                                             | SVM  | C5.0 | XGBoost | Ensemble |
| Accuracy                                                    | 0.81 | 0.78 | 0.79    | 0.81     |
| Precision                                                   | 0.75 | 0.71 | 0.72    | 0.75     |
| Recall                                                      | 0.79 | 0.74 | 0.77    | 0.79     |
| Specificity                                                 | 0.83 | 0.80 | 0.80    | 0.83     |
| Models for Predicting Persistent AKI in External Validation |      |      |         |          |
|                                                             | SVM  | C5.0 | XGBoost | Ensemble |
| Accuracy                                                    | 0.65 | 0.62 | 0.63    | 0.64     |
| Precision                                                   | 0.64 | 0.62 | 0.64    | 0.65     |
| Recall                                                      | 0.59 | 0.53 | 0.53    | 0.51     |
| Specificity                                                 | 0.70 | 0.71 | 0.72    | 0.75     |

AKI, acute kidney injury; SVM, support vector machine; XGBoost, extreme gradient boosting.

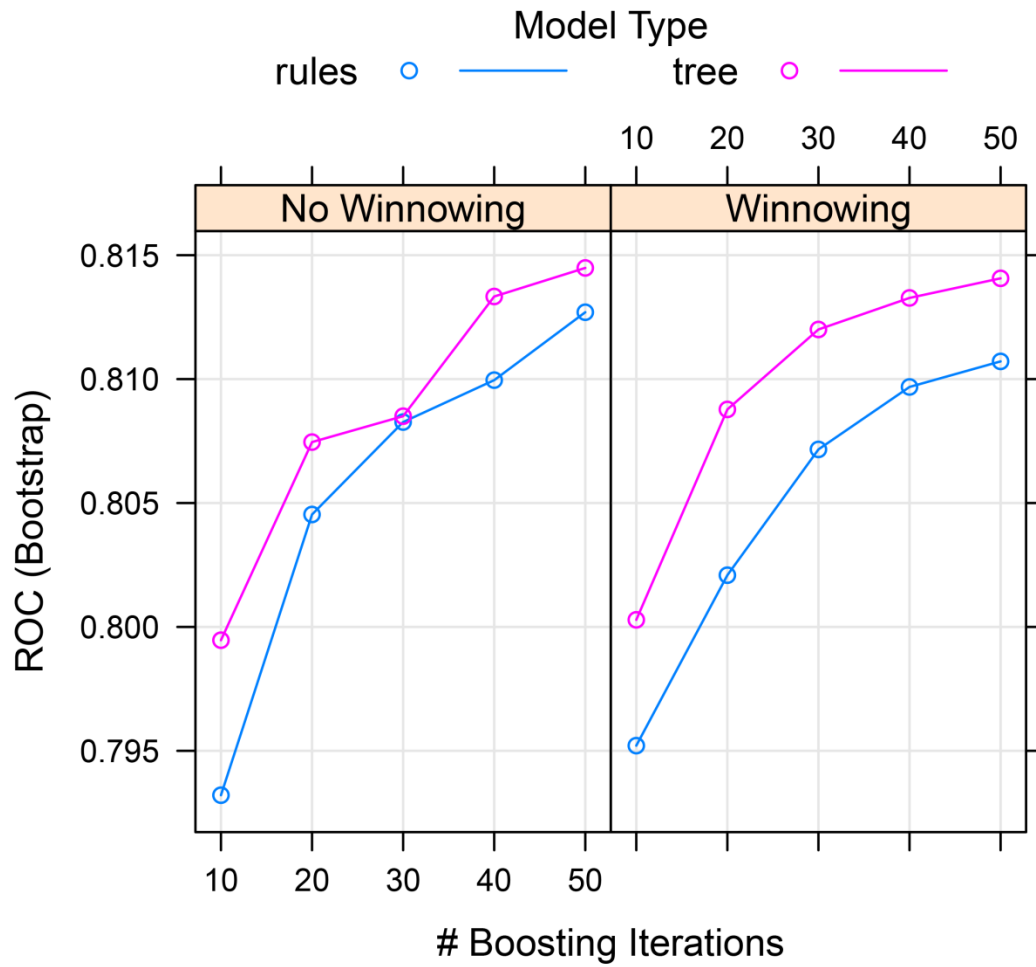

Figure S1. Hyperparameter tuning for the C5.0 machine-learning algorithm. Abbreviations: ROC, receiver operating characteristic.

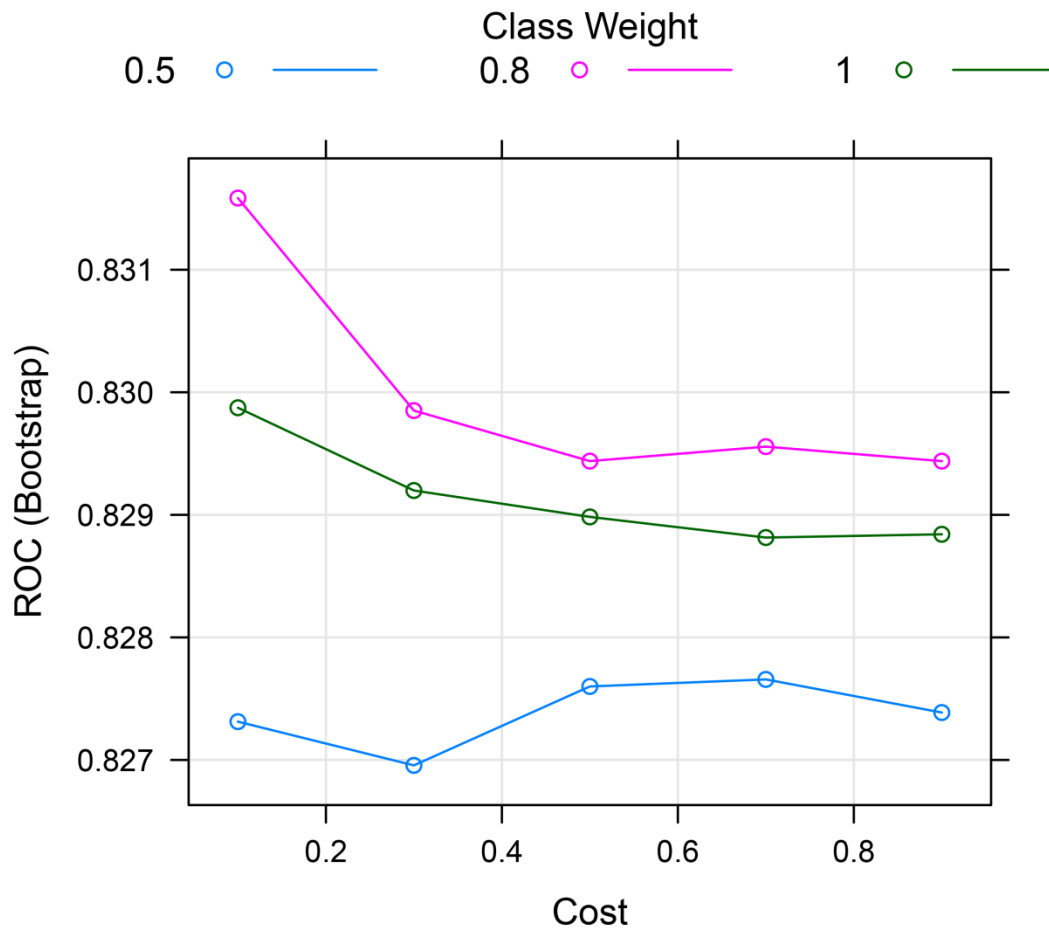

Figure S2. Hyperparameter tuning for the support vector machine machine-learning algorithm. Abbreviations: ROC, receiver operating characteristic.

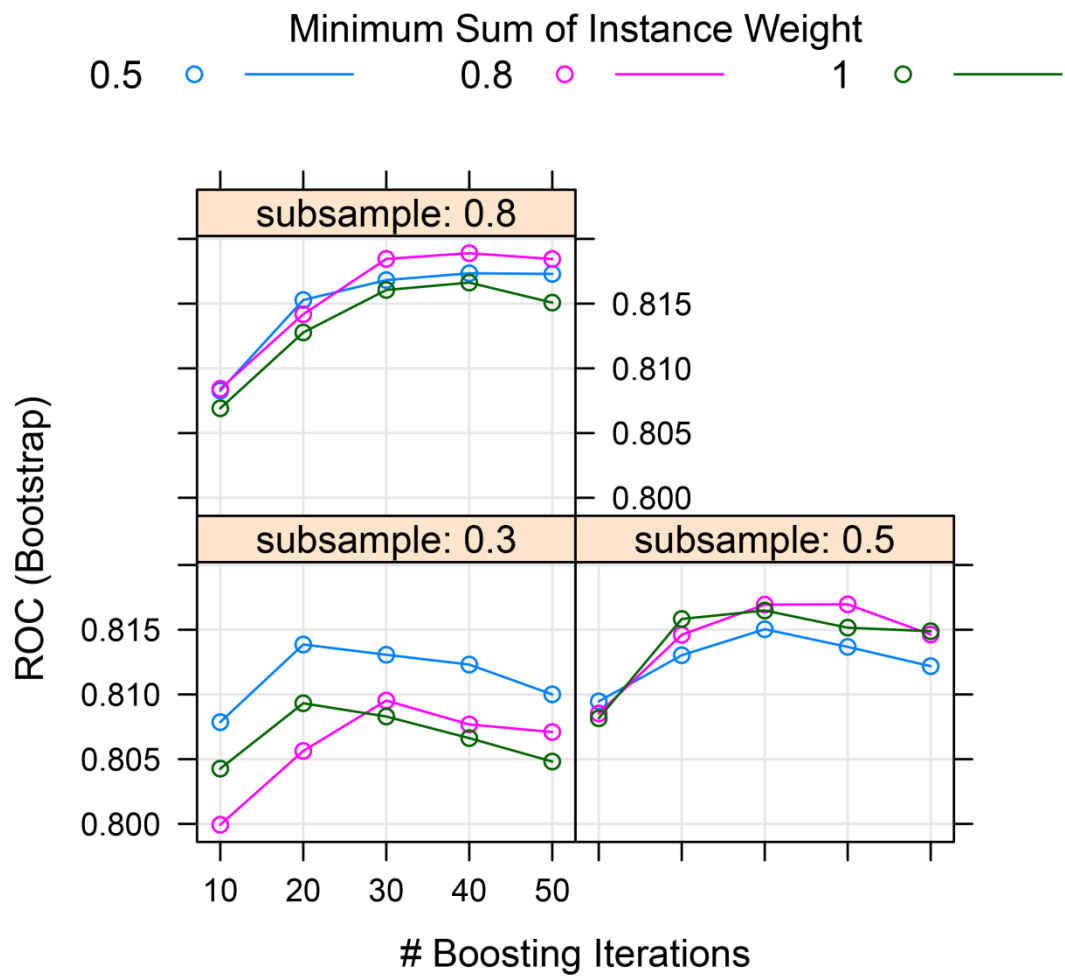

Figure S3. Hyperparameter tuning for the extreme gradient boosting machine-learning algorithm. Abbreviations: ROC, receiver operating characteristic.

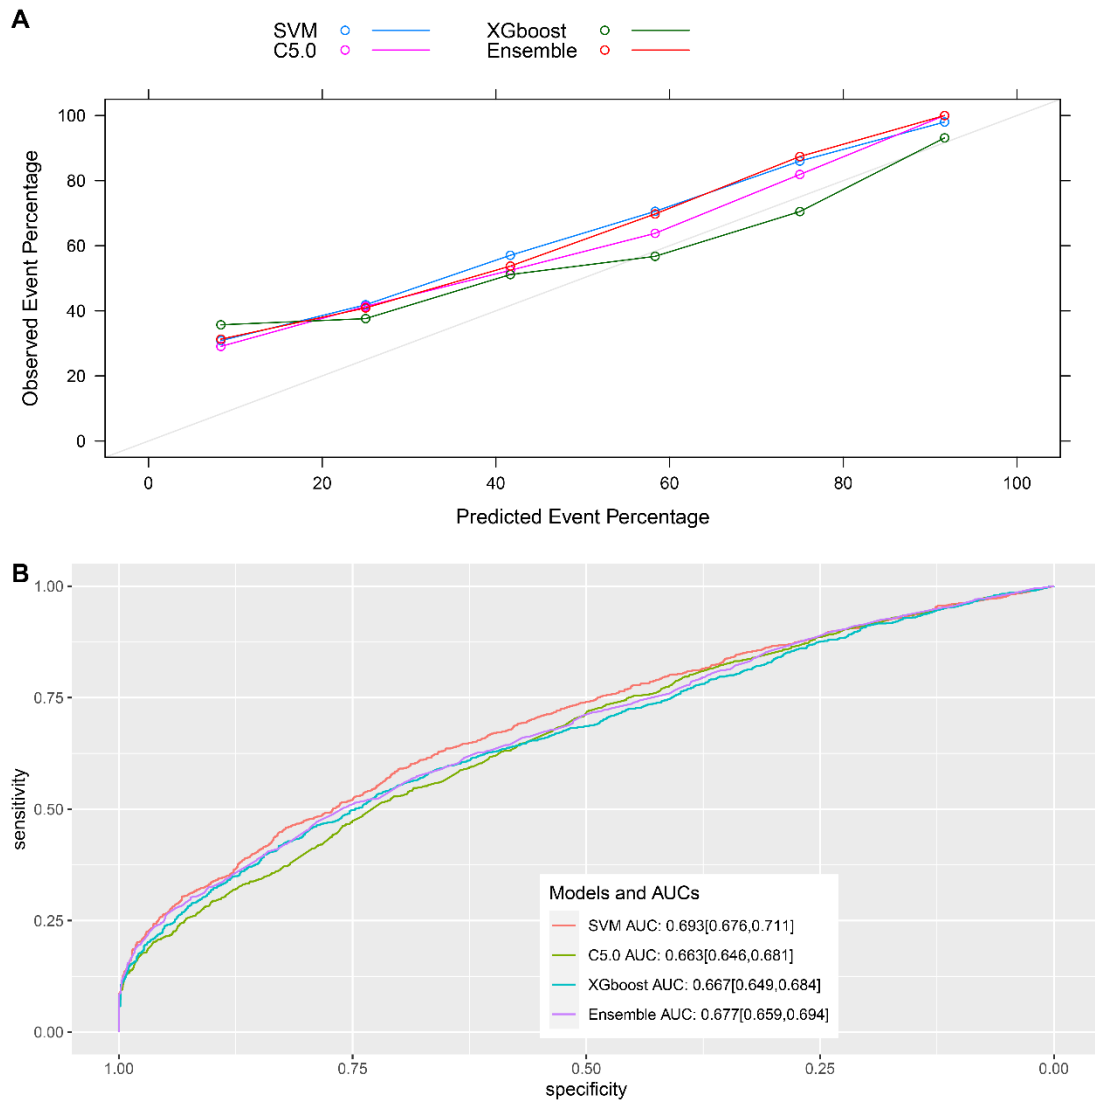

Figure S4. Evaluation of model performance in the external validation dataset. A) The calibration plot shows the consistency between observed and predicted risks for persistent acute kidney injury. B) Discrimination of the machine-learning models in the external validation dataset. SVM, support vector machine; XGBoost, extreme gradient boosting; AUC, area under the curve. The number in parentheses indicates the 95% confidence interval.

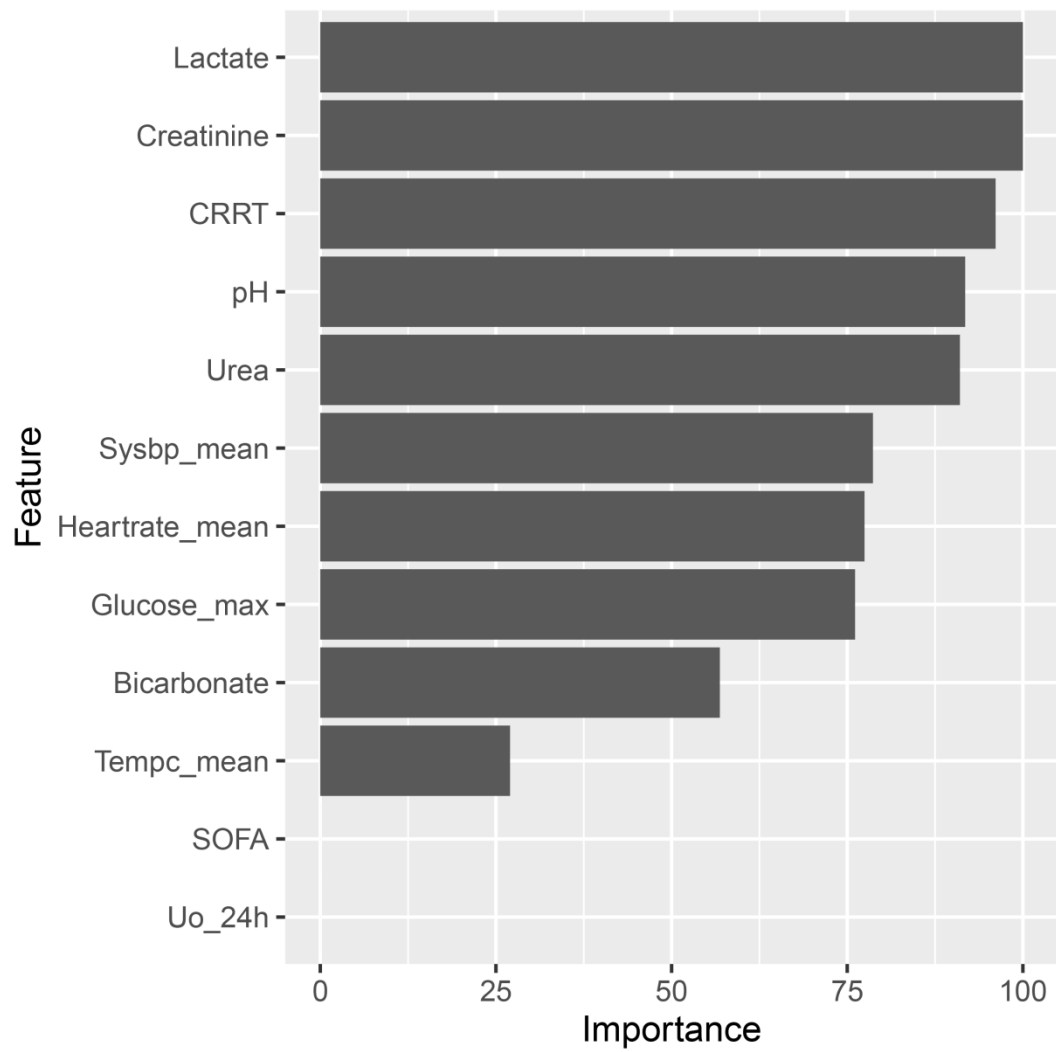

Figure S5. Variable-importance ranking in the C5.0. RRT, renal replacement therapy; SOFA, Sepsis-related Organ Failure Assessment; Uo\_24h, urine volume for 24 hours on ICU admission.



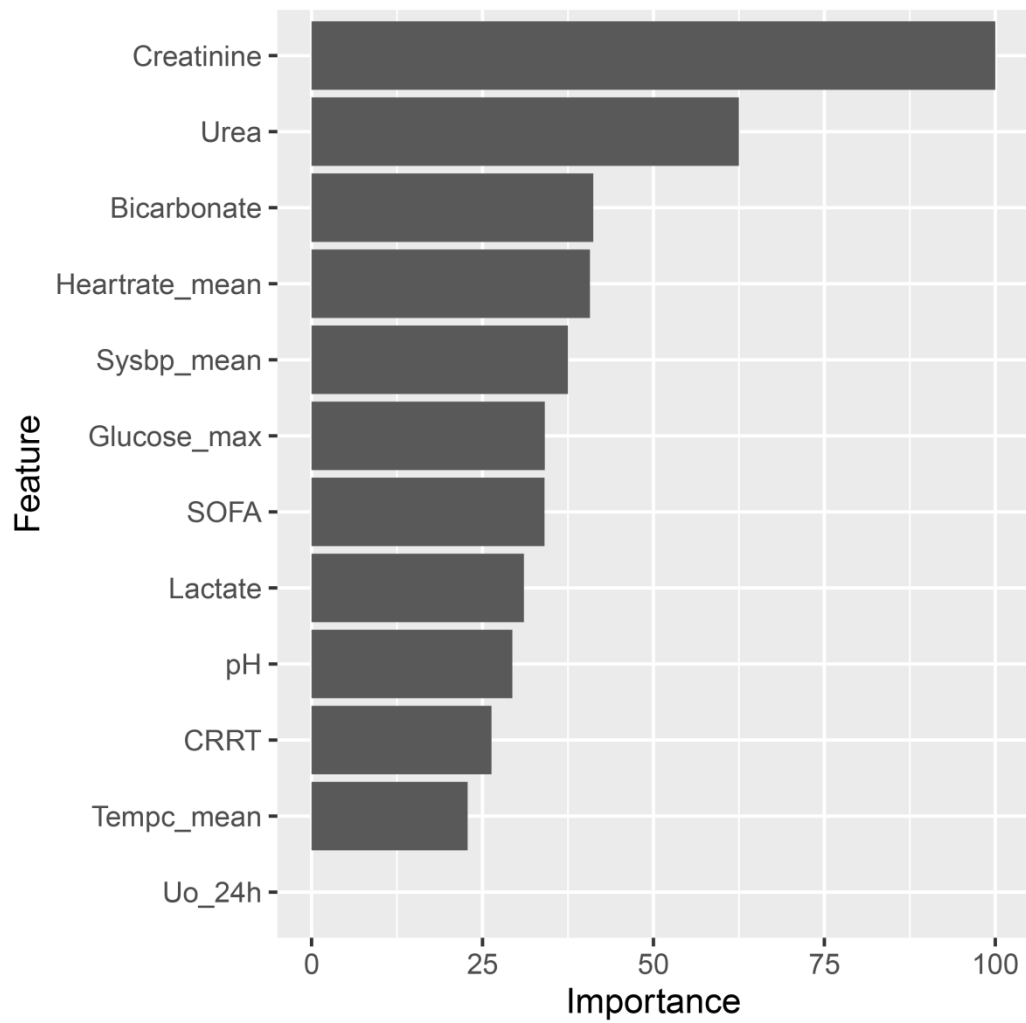

Figure S6. Variable-importance ranking in the support vector machine. RRT, renal replacement therapy; SOFA, Sepsis-related Organ Failure Assessment; Uo\_24h, urine volume for 24 hours on ICU admission.

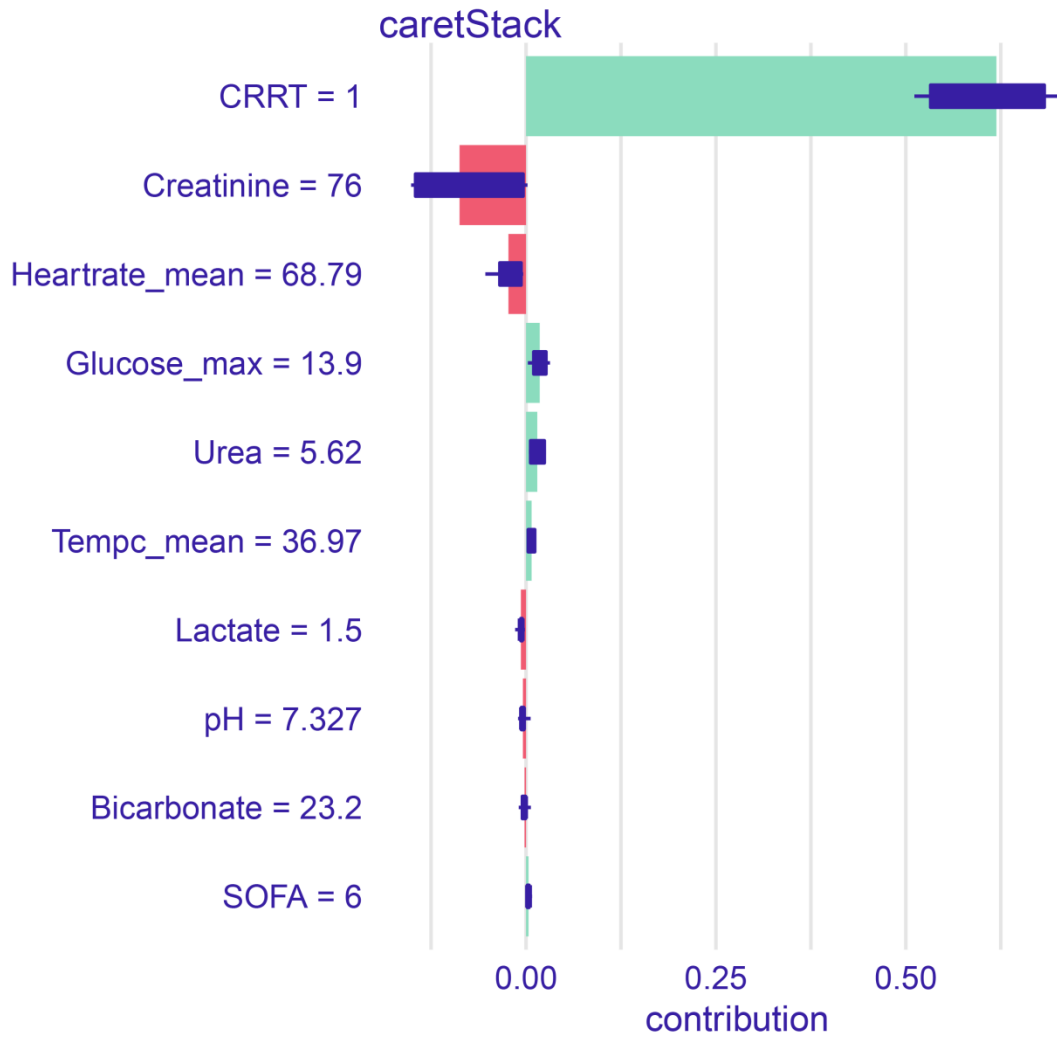

Figure S7. Model interpretation using the iBreakdown algorithm with uncertainty indicated by a box plot. The horizontal axis reflects the probability scale. RRT: renal replacement therapy; SOFA: Sepsis-related Organ Failure Assessment; Uo\_24h: Urine volume for 24 hours on intensive care unit admission.
